# Supplementary material
Source: Elsevier journal article supplement (https://rcastoragev2.blob.core.windows.net/92f409a662776c70d69c07861b44c245/mmc1.pdf)
Supplement: mmc1 [file mmc1.pdf]

**Supplementary Material for:**

**Different members of a simple 3-helix bundle protein family have very different folding rates and fold by different mechanisms.**

Beth G. Wensley, Martina Gärtner, WanXian Choo, Sarah Batey, Jane Clarke.

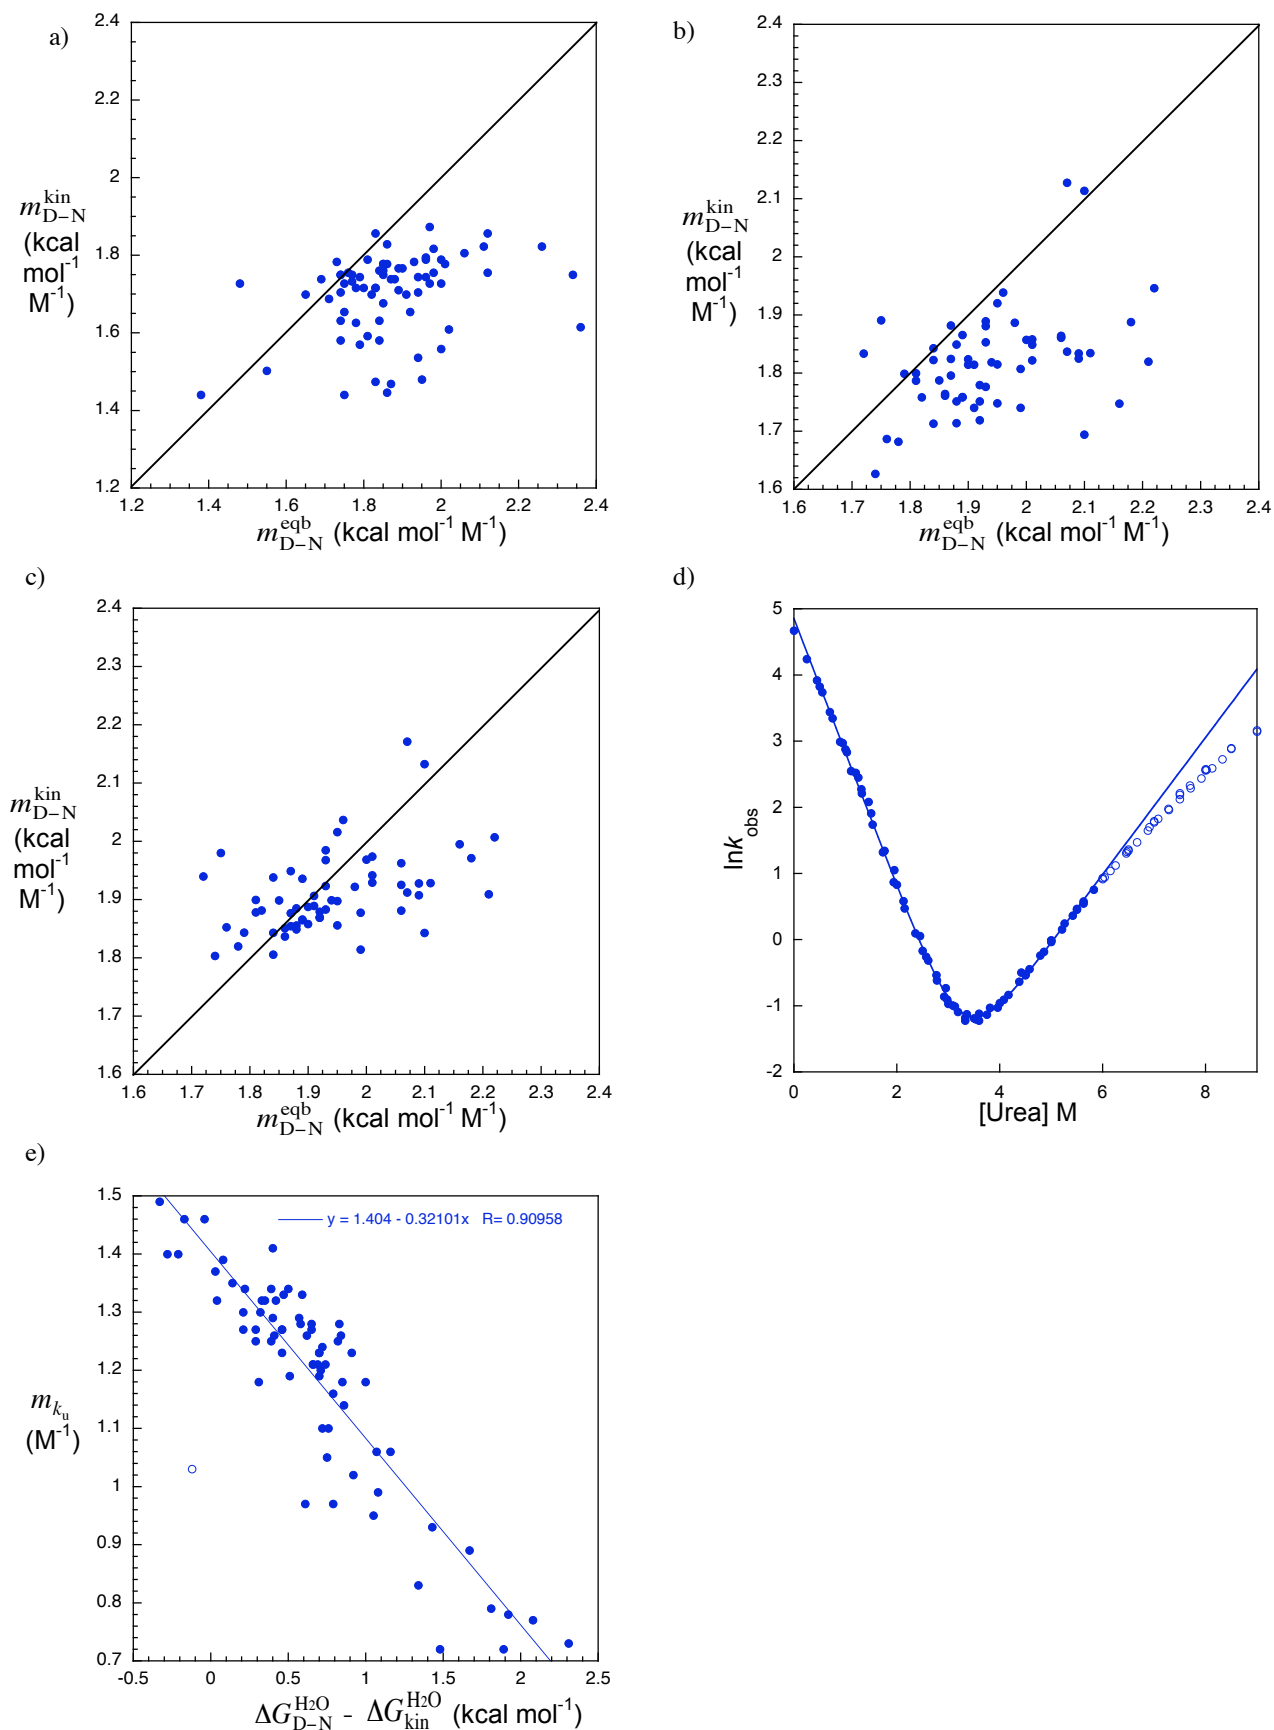

**Supplementary Figure S1.** The variation seen in  $m_{k_u}$  and its effects. (a) – (c) Comparisons of equilibrium ( $m_{D-N}^{\text{eqb}}$ ) and kinetic ( $m_{D-N}^{\text{kin}}$ )  $m_{D-N}$  for (a) wild-type R15 and all mutants, (b) wild-type R16 and all mutants using only data collected between 0 and 6 M urea and fit with a

standard two-state chevron fit and (c) R16 and all mutants using all data collected and fit with a sequential transition state fit<sup>1,2</sup>. Lines have the equation  $y = x$ . (d) The chevron plot for wild-type R16 at 25 °C. Data collected > 6 M urea have open circles and were not included in the fit. The continuous line represents the fit of the filled circles to a standard two-state chevron fit with parameters:  $k_f^{\text{H}_2\text{O}} = 128 \text{ s}^{-1}$ ,  $k_u^{\text{H}_2\text{O}} = 5 \times 10^{-3} \text{ s}^{-1}$ ,  $m_{k_f} = 2.0 \text{ M}^{-1}$ ,  $m_{k_u} = 1.0 \text{ M}^{-1}$ . (e) Effect of  $m_{k_u}$  on  $\Delta G_{\text{D-N}}^{\text{H}_2\text{O}} - \Delta G_{\text{kin}}^{\text{H}_2\text{O}}$  for wild-type R15 and all mutants. The equation shows a linear fit to the data. The open circle is I55A, which has a very short unfolding arm due to a low stability and low  $\Phi$ -value, and has been excluded from the fit.

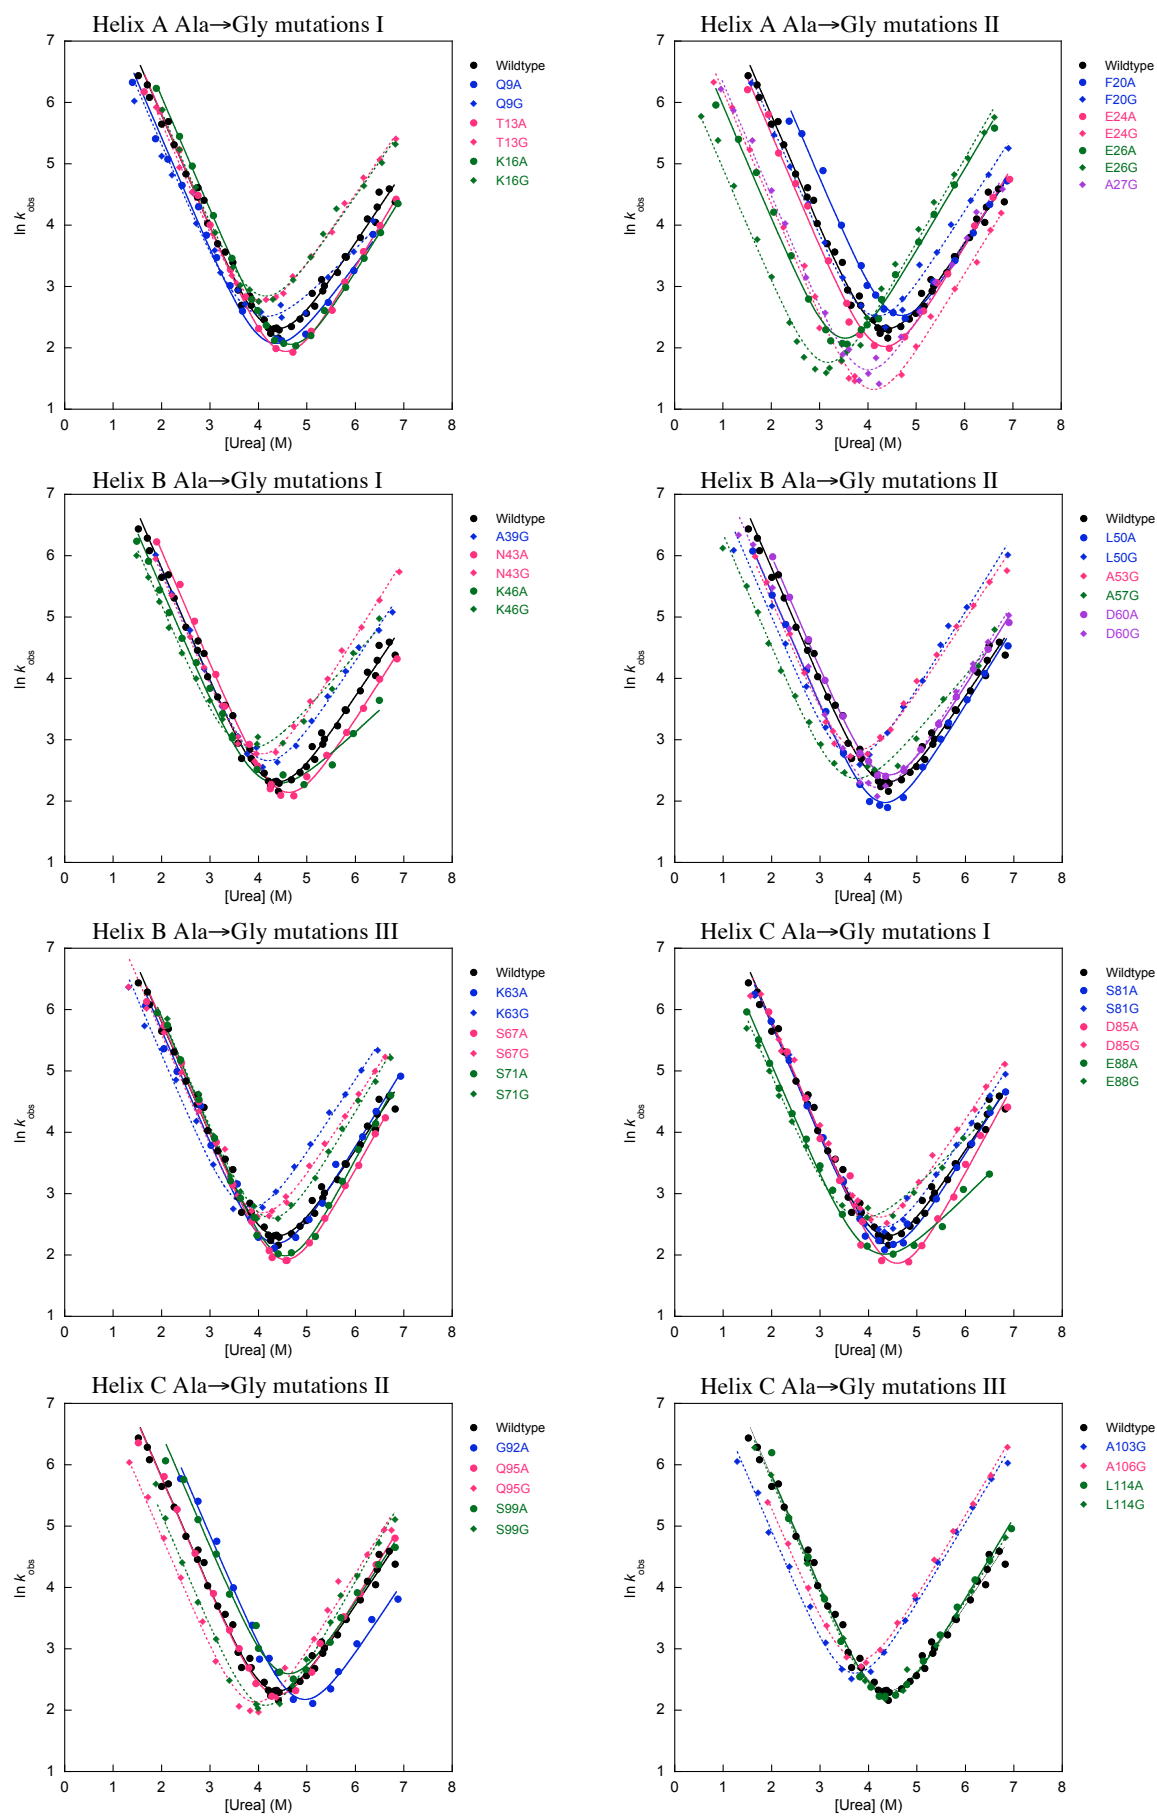

**Supplementary Figure S2**

**Supplementary Figure S2.** Chevron plots and fits for R15 Ala-Gly scanning mutations.

Continuous lines represent the fit for each mutant to a globally fitted two-state fit with a shared  $m_{k_f}$ .

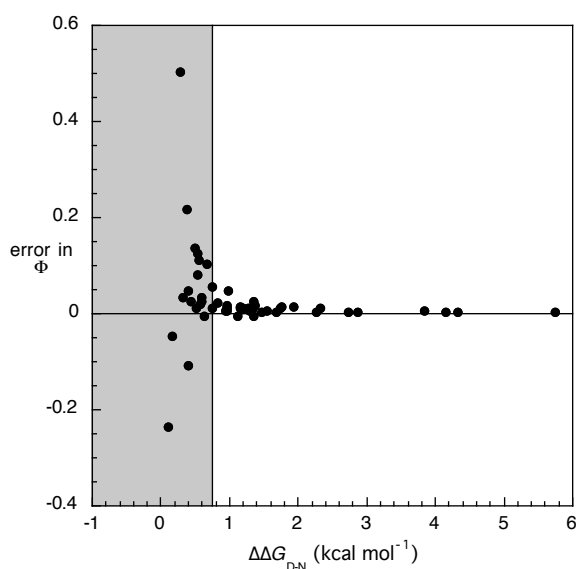

**Supplementary Figure S3.** The errors in  $\Phi$  are low where  $\Delta\Delta G_{D-N} \leq 0.75$ . This was the cut-off used in our study.

## References

1. Scott, K. A. & Clarke, J. (2005). Spectrin R16: broad energy barrier or sequential transition states? *Protein Sci.* **14**, 1617-1629.
2. Scott, K. A., Randles, L. G. & Clarke, J. (2004). The folding of spectrin domains II: phi-value analysis of R16. *J. Mol. Biol.* **344**, 207-221.
